# Supplementary material for: MACARON: a python framework to identify and re-annotate multi-base affected codons in whole genome/exome sequence data
Source: Oxford University Press journal article supplement (doi:10.1093/bioinformatics/bty382), 2018-05-02
Supplement: bioinformatics_34_19_3396_s2.docx [file bioinformatics_34_19_3396_s2.docx]

**Generation of temp_file1**

VCF file

VariantFiltration

(*--clusterSize 2* and *--clusterWindowSize 3*)

SelectVariants

(FILTER SnpCluster)

Annotation by SnpEff

Selecting variants records with SILENT, MISSENSE and NONSENSE SnpEff’s Functional Classes

**Generation of temp_file2**

Merging ALT2 Codons to produce ALT_merge-2VAR,

Correcting Amino Acid Change (AA_change-2VAR)

Merging ALT3 Codons to produce ALT_merge-3VAR,

Correcting Amino Acid Change (AA_change-3VAR)

**Generation of temp_file3**

**Generation of temp_file4**

List of clustered SNVs if new AA change is not matched with any of the individual SNV AA change

**Generation of OUTPUT file**

List of clustered SNVs if any of the sample has no reference homozygous

Read counts extraction of SNVs codons form BAM file by an in-house Accessory Script*

Figure S1. MACARON workflow showing the generation of temporary files (temp_fileN) and the final OUTPUT txt file. *The input of Accessory Script is a subset of BAM file covering 50 bps around candidate clustered SNVs.

Selection of clustered SNVs affecting their respective codons
