# Supplementary material for: MACARON: a python framework to identify and re-annotate multi-base affected codons in whole genome/exome sequence data
Source: Oxford University Press journal article supplement (doi:10.1093/bioinformatics/bty382), 2018-05-02
Supplement: bioinformatics_34_19_3396_s3.xlsx [file bioinformatics_34_19_3396_s3.xlsx]

## Sheet: Sheet1
CHR	POS1	POS2	rsID1	rsID2	GENE	AA Change1	AA Change2	Type of AA Change1	Type of AA Change2	gnomAD_AF1	gnomAD_AF2	SIFT_PRED_AA Change1	SIFT_PRED_AA Change2	pcSNV_ALT	AA Change_pcSNV	pcSNV_CODON	SIFT_PRED_AA Change_pcSNV	COMMENTS_gnomeAD_AF	% pcSNV_ALT_reads	pcSNV_ALT Read Count Mean	pcSNV_ALT Read Count Median	Count of Carriers
1	1372268	1372269	rs184782161	rs189168594	VWA1	G52E	G52	NONSYNONYMOUS	SYNONYMOUS	0.0069	0.0069	TOLERATED	NEUTRAL	AT	D	gAT	TOLERATED	RARE and RARE	44.19	51.9625	52.42	4
1	11854476	11854477	rs1801131	-	MTHFR	E470A	E470K	NONSYNONYMOUS	NONSYNONYMOUS	0.259	-	TOLERATED	TOLERATED	GT	T	ACa	TOLERATED	COMMON and RARE	43.48	NA	NA	1
1	68620905	68620906	rs754922833	rs764714551	WLS	V181	V181D	SYNONYMOUS	NONSYNONYMOUS	-	-	NEUTRAL	TOLERATED	CT	E	gAG	DAMAGING	RARE and RARE	45.12	NA	NA	1
1	100598866	100598867	rs472498	rs687513	TRMT13	A48T	A48V	NONSYNONYMOUS	NONSYNONYMOUS	0.7461	0.7462	TOLERATED	TOLERATED	AT	M	ATg	DAMAGING	COMMON and COMMON	34.38	45.3404	45	47
1	145706727	145706728	rs782557200	-	CD160	A11V	A11S	NONSYNONYMOUS	NONSYNONYMOUS	-	-	DAMAGING	DAMAGING	AA	F	TTc	DAMAGING	RARE and RARE	47.67	NA	NA	1
1	151748578	151748579	rs193006759	rs184233380	TDRKH	A404V	A404S	NONSYNONYMOUS	NONSYNONYMOUS	0.0057	0.0057	TOLERATED	TOLERATED	AA	F	TTt	DAMAGING	RARE and RARE	40.91	53.9433	59.38	3
1	159779464	159779465	rs115855950	rs116277008	FCRL6	S293P	S293F	NONSYNONYMOUS	NONSYNONYMOUS	0.0429	0.0428	TOLERATED	DAMAGING	CT	L	CTt	DAMAGING	COMMON and COMMON	41.51	NA	NA	1
1	201163305	201163306	rs189690117	rs41313898	IGFN1	P11T	P11R	NONSYNONYMOUS	NONSYNONYMOUS	0.0035	0.0035	DAMAGING	DAMAGING	AG	S	AGt	DAMAGING	RARE and RARE	35.06	46.216	44.71	5
1	207760772	207760773	rs61734514	rs3737002	CR1	T1858A	T1858M	NONSYNONYMOUS	NONSYNONYMOUS	0.0183	0.2285	TOLERATED	DAMAGING	GT	V	GTg	TOLERATED	COMMON and COMMON	40.54	48.6789	49.26	9
1	223116472	223116474	rs2609383	rs2789975	DISP1	E103K	E103D	NONSYNONYMOUS	NONSYNONYMOUS	0.1557	0.1556	TOLERATED	TOLERATED	ANT	N	AaT	TOLERATED	COMMON and COMMON	36.43	46.0113	46.3526	42
1	248004876	248004877	rs140921021	rs10888257	OR11L1	G108D	G108S	NONSYNONYMOUS	NONSYNONYMOUS	0.0036	0.8559	DAMAGING	DAMAGING	TT	N	AAc	DAMAGING	RARE and COMMON	46.34	NA	NA	1
2	26804247	26804248	rs935172	rs144812943	CIB4	H181R	H181Y	NONSYNONYMOUS	NONSYNONYMOUS	0.5173	3.234e-05	TOLERATED	DAMAGING	CA	C	TGc	DAMAGING	COMMON and RARE	43.09	NA	NA	1
2	179395554	179395555	rs66961115	rs67254537	TTN	A35263V	A35263S	NONSYNONYMOUS	NONSYNONYMOUS	0.0118	0.0118	TOLERATED	TOLERATED	AA	F	TTc	TOLERATED	COMMON and COMMON	37.74	40.1217	39.495	6
2	220502366	220502367	rs61729101	rs635311	SLC4A3	D894H	D894A	NONSYNONYMOUS	NONSYNONYMOUS	0.0117	0.7138	TOLERATED	TOLERATED	CC	P	CCt	TOLERATED	COMMON and COMMON	37.5	46.1325	46.88	4
2	226378241	226378242	rs61752215	rs61753537	NYAP2	G126S	G126D	NONSYNONYMOUS	NONSYNONYMOUS	0.0072	0.0072	TOLERATED	TOLERATED	AA	N	AAc	TOLERATED	RARE and RARE	53.15	54.7833	53.62	3
2	228194480	228194481	rs3211097	rs3211098	MFF	S7C	S7I	NONSYNONYMOUS	NONSYNONYMOUS	0.2736	0.2737	DAMAGING	TOLERATED	TT	F	TTt	DAMAGING	COMMON and COMMON	21.63	42.3616	42.61	95
2	242157040	242157041	rs193252571	rs535890617	ANO7	A4S	A4V	NONSYNONYMOUS	NONSYNONYMOUS	0.0014	0.0014	DAMAGING	DAMAGING	TT	L	TTg	DAMAGING	RARE and RARE	48.48	54.885	54.885	2
3	14939088	14939089	rs2307092	rs2307091	FGD5	E941K	E941V	NONSYNONYMOUS	NONSYNONYMOUS	0.0257	0.0257	TOLERATED	TOLERATED	AT	M	ATg	TOLERATED	COMMON and COMMON	44.23	51.378	48.15	5
3	37089130	37089131	rs35001569	rs63750449	MLH1	K618E	K618T	NONSYNONYMOUS	NONSYNONYMOUS	0.0031	0.0031	DAMAGING	DAMAGING	GC	A	GCg	DAMAGING	RARE and RARE	41.22	43.68	44.3	4
3	46007823	46007825	rs13079478	rs13059238	FYCO1	N1001K	N1001D	NONSYNONYMOUS	NONSYNONYMOUS	0.0851	0.089	TOLERATED	TOLERATED	TNC	E	GaA	TOLERATED	COMMON and COMMON	29.48	44.8518	43.75	33
3	153839959	153839960	rs59508481	rs12497267	ARHGEF26	L60F	L60P	NONSYNONYMOUS	NONSYNONYMOUS	0.6737	0.9031	DAMAGING	TOLERATED	TC	S	TCc	TOLERATED	COMMON and COMMON	32.56	53.3364	49.385	72
3	158450169	158450171	rs147016103	rs754539084	RARRES1	W12C	W12R	NONSYNONYMOUS	NONSYNONYMOUS	0.1878	0.0027	DAMAGING	TOLERATED	GNT	S	AgC	TOLERATED	COMMON and RARE	35.9	NA	NA	1
3	194338423	194338424	rs12695036	rs58679389	TMEM44	R232H	R232G	NONSYNONYMOUS	NONSYNONYMOUS	0.3774	0.0953	DAMAGING	DAMAGING	TC	D	GAt	DAMAGING	COMMON and COMMON	34.62	46.3254	45.9	13
4	83350719	83350720	rs61729823	rs200018272	HNRNPDL	L42P	L42F	NONSYNONYMOUS	NONSYNONYMOUS	0.0039	0.0039	DAMAGING	DAMAGING	GA	S	TCc	DAMAGING	RARE and RARE	43.48	48.3033	50	3
4	156289667	156289668	rs751967516	rs755301137	MAP9	R187K	R187G	NONSYNONYMOUS	NONSYNONYMOUS	-	-	DAMAGING	DAMAGING	TC	E	GAa	DAMAGING	RARE and RARE	51.85	NA	NA	1
5	9265600	9265602	rs111352189	rs7734564	SEMA5A	G19	G19S	SYNONYMOUS	NONSYNONYMOUS	0.0364	0.3729	NEUTRAL	TOLERATED	CNT	R	AgG	DAMAGING	COMMON and COMMON	1.16	1.41473	1.41473	2
5	76373240	76373241	rs2303713	rs2303714	ZBED3	L155P	L155V	NONSYNONYMOUS	NONSYNONYMOUS	0.2465	0.2465	TOLERATED	TOLERATED	GC	A	GCg	TOLERATED	COMMON and COMMON	11.11	45.7001	44.44	71
5	134368747	134368748	rs778634123	rs747988603	PITX1	A26V	A26S	NONSYNONYMOUS	NONSYNONYMOUS	0.0005	0.0005	DAMAGING	DAMAGING	AA	L	TTg	DAMAGING	RARE and RARE	23.81	NA	NA	1
5	140230370	140230371	rs369636	rs369639	PCDHA9	K764Q	K764T	NONSYNONYMOUS	NONSYNONYMOUS	0.6466	0.6459	DAMAGING	TOLERATED	CC	P	CCg	TOLERATED	COMMON and COMMON	25.71	49.2264	44.44	77
5	140502343	140502344	rs3733698	rs3733697	PCDHB4	P255S	P255L	NONSYNONYMOUS	NONSYNONYMOUS	0.1677	0.1677	TOLERATED	DAMAGING	TT	F	TTc	DAMAGING	COMMON and COMMON	28.57	43.3284	43.88	45
5	148407892	148407893	rs6874630	rs6875902	SH3TC2	A468V	A468S	NONSYNONYMOUS	NONSYNONYMOUS	0.0039	0.2226	TOLERATED	TOLERATED	AA	F	TTc	DAMAGING	RARE and COMMON	42.67	NA	NA	1
5	149275986	149275987	-	-	PDE6A	L518R	L518V	NONSYNONYMOUS	NONSYNONYMOUS	-	-	DAMAGING	DAMAGING	CC	G	GGg	DAMAGING	RARE and RARE	44.12	NA	NA	1
6	3438737	3438738	rs79336898	rs12197689	SLC22A23	R38H	R38C	NONSYNONYMOUS	NONSYNONYMOUS	9.682e-05	0.6449	TOLERATED	DAMAGING	TA	Y	TAc	TOLERATED	RARE and COMMON	46.15	NA	NA	1
6	26463574	26463575	rs13195401	rs13195402	BTN2A1	W178L	W178C	NONSYNONYMOUS	NONSYNONYMOUS	0.057	0.057	DAMAGING	DAMAGING	TT	F	tTT	DAMAGING	COMMON and COMMON	26.32	46.3267	48.19	27
6	28331127	28331128	rs13201752	rs13201753	ZKSCAN3	K200E	K200T	NONSYNONYMOUS	NONSYNONYMOUS	0.3368	0.3368	TOLERATED	TOLERATED	GC	A	GCa	TOLERATED	COMMON and COMMON	32.43	43.5044	44.7	77
6	29694680	29694681	rs3734814	rs3734815	HLA-F	N353H	N353I	NONSYNONYMOUS	NONSYNONYMOUS	0.1715	0.1716	DAMAGING	DAMAGING	CT	L	CTc	DAMAGING	COMMON and COMMON	21.74	44.9211	43.63	38
6	30994025	30994026	rs570804301	rs534992021	MUC22	T273A	T273K	NONSYNONYMOUS	NONSYNONYMOUS	0.0333	0.0311	TOLERATED	DAMAGING	GA	E	GAa	DAMAGING	COMMON and COMMON	41.46	43.175	43.175	2
6	31170227	31170228	rs73728294	rs9366770	HCG27	K68R	K68N	NONSYNONYMOUS	NONSYNONYMOUS	0.0968	0.4521	TOLERATED	TOLERATED	GC	S	aGC	NEUTRAL	COMMON and COMMON	23.53	41.808	42.31	25
6	31762843	31762844	rs2607015	rs2753960	VARS	P51R	P51T	NONSYNONYMOUS	NONSYNONYMOUS	0.3621	0.3623	TOLERATED	TOLERATED	CT	S	AGc	TOLERATED	COMMON and COMMON	24.59	44.9134	41.25	87
6	31857069	31857070	rs377663072	rs370577451	EHMT2	S407R	S407N	NONSYNONYMOUS	NONSYNONYMOUS	3.236e-05	3.235e-05	DAMAGING	DAMAGING	TT	K	aAA	TOLERATED	RARE and RARE	43.16	NA	NA	1
6	32942354	32942355	rs55669504	rs3918144	BRD2	A49S	A49G	NONSYNONYMOUS	NONSYNONYMOUS	0.0124	0.0124	TOLERATED	DAMAGING	TG	C	TGt	DAMAGING	COMMON and COMMON	43.88	46.52	45.045	6
6	33037579	33037580	rs2308912	rs2308911	HLA-DPA1	M62K	M62L	NONSYNONYMOUS	NONSYNONYMOUS	0.2758	0.2759	TOLERATED	TOLERATED	TG	Q	CAg	TOLERATED	COMMON and COMMON	28.57	38.9554	38.065	52
6	47624298	47624299	-	rs9369730	GPR111	H26N	H26R	NONSYNONYMOUS	NONSYNONYMOUS	3.228e-05	0.6001	DAMAGING	DAMAGING	AG	S	AGt	DAMAGING	RARE and COMMON	43.04	NA	NA	1
6	73752808	73752810	rs117168907	rs117594643	KCNQ5	V49L	V49	NONSYNONYMOUS	SYNONYMOUS	0.0058	0.0057	TOLERATED	NEUTRAL	TNT	F	TtT	TOLERATED	RARE and RARE	46.49	NA	NA	1
6	150716696	150716697	rs612421	rs4479949	IYD	C265R	C265Y	NONSYNONYMOUS	NONSYNONYMOUS	0.9115	0.165	TOLERATED	TOLERATED	CA	H	CAc	TOLERATED	COMMON and COMMON	36.28	46.7	49.065	8
6	152658141	152658142	rs28385621	rs9479297	SYNE1	K4121N	K4121R	NONSYNONYMOUS	NONSYNONYMOUS	0.0641	0.8208	DAMAGING	TOLERATED	AC	S	aGT	DAMAGING	COMMON and COMMON	20	45.8967	48.72	21
7	36445855	36445856	rs61737563	rs197367	ANLN	R185	R185K	SYNONYMOUS	NONSYNONYMOUS	0.0795	0.5934	NEUTRAL	TOLERATED	CA	Q	CAa	DAMAGING	COMMON and COMMON	32.91	45.9243	45.95	35
7	43540840	43540841	rs117557838	rs116945469	HECW1	V1184I	V1184A	NONSYNONYMOUS	NONSYNONYMOUS	0.0078	0.0073	TOLERATED	TOLERATED	AC	T	ACc	DAMAGING	RARE and RARE	1.69	25.0733	23.53	3
7	88964226	88964227	rs79931924	rs76870774	ZNF804B	P644T	P644R	NONSYNONYMOUS	NONSYNONYMOUS	0.0536	0.0536	TOLERATED	DAMAGING	AG	S	AGt	TOLERATED	COMMON and COMMON	36.36	45.2461	44.62	18
7	98650051	98650052	rs219797	rs773473254	SMURF1	S166	S166F	SYNONYMOUS	NONSYNONYMOUS	0.6135	-	NEUTRAL	DAMAGING	CA	L	tTG	TOLERATED	COMMON and RARE	47.3	NA	NA	1
7	100551565	100551566	rs73163757	rs78538898	MUC3A	M106V	M106T	NONSYNONYMOUS	NONSYNONYMOUS	0.4126	0.4126	TOLERATED	TOLERATED	GC	A	GCg	TOLERATED	COMMON and COMMON	22.02	34.5184	34.56	193
7	100552549	100552550	rs73163760	rs73163762	MUC3A	L434I	L434P	NONSYNONYMOUS	NONSYNONYMOUS	0.4105	0.432	TOLERATED	TOLERATED	AC	T	ACa	TOLERATED	COMMON and COMMON	14.84	36.3883	37.23	193
7	156433332	156433333	rs183147461	rs573687732	C7orf13	A6V	A6S	NONSYNONYMOUS	NONSYNONYMOUS	0.0048	0.0048	TOLERATED	TOLERATED	AA	F	TTc	DAMAGING	RARE and RARE	2.7	44.3217	49.275	6
8	10555472	10555473	-	rs781534946	C8orf74	A202D	A202	NONSYNONYMOUS	SYNONYMOUS	-	-	TOLERATED	NEUTRAL	AG	E	gAG	TOLERATED	RARE and RARE	60	NA	NA	1
8	18729817	18729818	rs7016219	rs7003060	PSD3	T186M	T186P	NONSYNONYMOUS	NONSYNONYMOUS	0.7492	0.7494	TOLERATED	TOLERATED	AG	L	CTg	TOLERATED	COMMON and COMMON	1.26	51.6156	48	75
8	144802735	144802736	rs6420190	rs6420191	MAPK15	R247	R247T	SYNONYMOUS	NONSYNONYMOUS	0.2381	0.2379	NEUTRAL	TOLERATED	CC	P	CCg	TOLERATED	COMMON and COMMON	38.64	45.5748	45.345	48
9	13190162	13190163	rs4740548	rs4741289	MPDZ	E702V	E702K	NONSYNONYMOUS	NONSYNONYMOUS	0.0134	0.0134	DAMAGING	DAMAGING	AT	M	ATg	DAMAGING	COMMON and COMMON	36.71	44.0025	45.135	4
9	133901819	133901820	rs2275137	rs2275136	LAMC3	P174H	P174	NONSYNONYMOUS	SYNONYMOUS	0.2736	0.1525	TOLERATED	NEUTRAL	AG	Q	cAG	TOLERATED	COMMON and COMMON	30.77	44.4211	44.6	35
10	8007559	8007560	rs10795583	rs1244229	TAF3	V696L	V696A	NONSYNONYMOUS	NONSYNONYMOUS	0.5653	0.6859	DAMAGING	TOLERATED	CC	P	CCg	TOLERATED	COMMON and COMMON	30.36	49.5648	46.34	91
10	27702725	27702726	rs6482626	rs11015753	PTCHD3	L152P	L152	NONSYNONYMOUS	SYNONYMOUS	0.2465	0.2196	DAMAGING	NEUTRAL	GA	S	TCg	DAMAGING	COMMON and COMMON	1.4	NA	NA	1
10	50121784	50121785	rs10776653	rs11101561	LRRC18	T139	T139I	SYNONYMOUS	NONSYNONYMOUS	0.5328	0.1057	NEUTRAL	TOLERATED	CA	M	aTG	TOLERATED	COMMON and COMMON	30.3	45.1371	44.87	7
11	7022159	7022160	rs185967590	rs2857919	ZNF214	C252Y	C252R	NONSYNONYMOUS	NONSYNONYMOUS	3.236e-05	0.9132	TOLERATED	TOLERATED	TG	H	CAt	TOLERATED	RARE and COMMON	37.19	NA	NA	1
11	15247307	15247308	rs61748861	rs185956954	INSC	A415D	A415	NONSYNONYMOUS	SYNONYMOUS	0.0044	0.0044	DAMAGING	NEUTRAL	AA	E	gAA	DAMAGING	RARE and RARE	36.73	NA	NA	1
11	48346961	48346962	rs75493089	rs74589050	OR4C3	N157Y	N157S	NONSYNONYMOUS	NONSYNONYMOUS	0.412	0.4124	TOLERATED	DAMAGING	TG	C	TGt	DAMAGING	COMMON and COMMON	26.46	38.4182	38.12	193
11	56468560	56468561	rs10896516	rs10896517	OR9G1	Y233H	Y233C	NONSYNONYMOUS	NONSYNONYMOUS	0.442	0.442	DAMAGING	TOLERATED	CG	R	CGc	TOLERATED	COMMON and COMMON	12.57	40.8837	39.82	188
11	60892605	60892606	rs34209302	rs637186	CD5	H461Y	H461R	NONSYNONYMOUS	NONSYNONYMOUS	0.0285	0.9424	DAMAGING	TOLERATED	TG	C	TGc	DAMAGING	COMMON and COMMON	39.36	44.66	44.895	4
11	77920808	77920809	rs75766028	rs77171344	USP35	G636D	G636	NONSYNONYMOUS	SYNONYMOUS	0.0123	0.0123	TOLERATED	NEUTRAL	AA	E	gAA	TOLERATED	COMMON and COMMON	46.05	49.91	48.67	4
12	12291830	12291831	rs150190776	rs138650437	BCL2L14	E258K	E258V	NONSYNONYMOUS	NONSYNONYMOUS	0.0017	0.0017	DAMAGING	DAMAGING	AT	M	ATg	DAMAGING	RARE and RARE	36.84	NA	NA	1
12	99038358	99038359	rs370371079	rs374336587	IKBIP	A41V	A41S	NONSYNONYMOUS	NONSYNONYMOUS	0.0003	0.0003	TOLERATED	DAMAGING	AA	L	TTa	TOLERATED	RARE and RARE	46.91	50.6	50.6	2
12	102158763	102158764	rs10778148	rs76889468	GNPTAB	T644	T644I	SYNONYMOUS	NONSYNONYMOUS	0.5896	0.0206	NEUTRAL	DAMAGING	CA	M	aTG	DAMAGING	COMMON and COMMON	40	45.6911	46.73	9
12	110011229	110011230	rs10774774	rs10774775	MMAB	R19	R19H	SYNONYMOUS	NONSYNONYMOUS	0.3156	0.3153	NEUTRAL	DAMAGING	TT	Q	cAA	TOLERATED	COMMON and COMMON	24.53	44.7275	43.465	60
12	132466835	132466836	rs145263930	rs148078602	EP400	P617T	P617L	NONSYNONYMOUS	NONSYNONYMOUS	0.0079	0.008	DAMAGING	DAMAGING	AT	M	ATg	DAMAGING	RARE and RARE	45.52	47.415	47.415	2
14	90767607	90767609	rs3825661	rs79341977	NRDE2	V507	V507M	SYNONYMOUS	NONSYNONYMOUS	0.6788	0.0036	NEUTRAL	DAMAGING	TNT	I	AtA	DAMAGING	COMMON and RARE	51.02	53.288	53.288	2
14	95921733	95921734	rs771184132	rs781208017	SYNE3	A373E	A373T	NONSYNONYMOUS	NONSYNONYMOUS	3.233e-05	3.233e-05	TOLERATED	TOLERATED	TT	K	AAa	DAMAGING	RARE and RARE	47.17	NA	NA	1
14	96742496	96742497	rs60062779	rs75870153	DKFZP434O1614	A75V	A75T	NONSYNONYMOUS	NONSYNONYMOUS	0.0033	0.0033	DAMAGING	DAMAGING	AT	M	ATg	DAMAGING	RARE and RARE	42.63	NA	NA	1
15	33446301	33446302	rs61744880	rs192749688	FMN1	S272T	S272G	NONSYNONYMOUS	NONSYNONYMOUS	0.0166	0.0127	DAMAGING	DAMAGING	GC	A	GCc	DAMAGING	COMMON and COMMON	45	50.5625	49.245	4
15	41634587	41634588	rs7178634	rs7178777	NUSAP1	T33A	T33N	NONSYNONYMOUS	NONSYNONYMOUS	0.3831	0.3831	DAMAGING	DAMAGING	GA	D	GAc	TOLERATED	COMMON and COMMON	20	41.5723	40.525	74
15	67500977	67500978	rs544916355	rs564806767	AAGAB	A213V	A213P	NONSYNONYMOUS	NONSYNONYMOUS	0.0003	0.0003	TOLERATED	TOLERATED	AG	L	CTa	TOLERATED	RARE and RARE	19.23	24.568	26.09	4
15	83781598	83781599	rs80329914	rs79470022	TM6SF1	L48	L48R	SYNONYMOUS	NONSYNONYMOUS	0.0503	0.0503	NEUTRAL	DAMAGING	TG	W	TGg	DAMAGING	COMMON and COMMON	1.69	24.568	26.09	24
15	101606889	101606890	rs2924835	rs2959197	LRRK1	G1938D	G1938	NONSYNONYMOUS	SYNONYMOUS	0.2576	0.2576	DAMAGING	NEUTRAL	AA	E	gAA	DAMAGING	COMMON and COMMON	1.49	44.0306	44.29	63
16	633353	633354	rs710924	rs710925	PIGQ	C668R	C668Y	NONSYNONYMOUS	NONSYNONYMOUS	0.4696	0.4692	DAMAGING	DAMAGING	CA	H	CAt	DAMAGING	COMMON and COMMON	36.09	47.889	47.59	90
16	1544301	1544302	rs2667660	rs2667661	TELO2	E7Q	E7G	NONSYNONYMOUS	NONSYNONYMOUS	0.2458	0.246	TOLERATED	TOLERATED	CG	R	CGg	TOLERATED	COMMON and COMMON	36.04	45.1562	44.115	66
16	2028401	2028402	rs771342957	rs8460	TBL3	R741Q	R741	NONSYNONYMOUS	SYNONYMOUS	3.234e-05	0.4083	TOLERATED	NEUTRAL	AC	H	cAC	TOLERATED	RARE and COMMON	52.38	NA	NA	1
16	3640784	3640785	rs78637028	rs59939128	SLX4	A952V	A952T	NONSYNONYMOUS	NONSYNONYMOUS	0.0532	0.0794	DAMAGING	TOLERATED	AT	M	ATg	DAMAGING	COMMON and COMMON	37.04	46.4032	45.13	22
16	3726074	3726075	rs61753377	rs61753378	TRAP1	S259	S259F	SYNONYMOUS	NONSYNONYMOUS	0.0519	0.0517	NEUTRAL	DAMAGING	CA	L	tTG	TOLERATED	COMMON and COMMON	34.04	45.8732	43.9	19
16	54319850	54319851	rs538043692	rs556340325	IRX3	A38V	A38S	NONSYNONYMOUS	NONSYNONYMOUS	0.002	0.002	TOLERATED	TOLERATED	AA	F	TTc	DAMAGING	RARE and RARE	42.31	NA	NA	1
16	84209815	84209816	rs2288021	rs2288022	DNAAF1	L659V	L659P	NONSYNONYMOUS	NONSYNONYMOUS	0.1626	0.2835	DAMAGING	TOLERATED	GC	A	GCa	TOLERATED	COMMON and COMMON	1.11	1.13667	1.12	3
17	663467	663468	rs74757321	rs75027378	GLOD4	A296	A296E	SYNONYMOUS	NONSYNONYMOUS	0.0147	0.0147	NEUTRAL	TOLERATED	AT	D	gAT	TOLERATED	COMMON and COMMON	41.67	43.4533	43.33	3
17	695061	695062	rs75658007	rs80220493	RNMTL1	V339I	V339D	NONSYNONYMOUS	NONSYNONYMOUS	0.0144	0.0144	DAMAGING	DAMAGING	AA	N	AAt	DAMAGING	COMMON and COMMON	49.19	51.7367	50.96	3
17	5425076	5425077	rs146932154	rs11651270	NLRP1	M1184T	M1184V	NONSYNONYMOUS	NONSYNONYMOUS	0.0096	0.4631	DAMAGING	TOLERATED	GC	A	GCg	TOLERATED	RARE and COMMON	28.57	47.0233	50	3
17	10542471	10542472	rs2285475	rs142002449	MYH3	R1046	R1046Q	SYNONYMOUS	NONSYNONYMOUS	0.584	0.0004	NEUTRAL	DAMAGING	GT	H	cAC	DAMAGING	COMMON and RARE	51.28	NA	NA	1
17	39616429	39616430	rs117083040	rs2604953	KRT32	P427L	P427T	NONSYNONYMOUS	NONSYNONYMOUS	0.014	0.8817	TOLERATED	TOLERATED	AT	I	ATc	DAMAGING	COMMON and COMMON	31.03	43.1167	42.22	9
17	42987523	42987524	rs9908084	rs9916491	GFAP	T43M	T43A	NONSYNONYMOUS	NONSYNONYMOUS	0.1367	0.2768	DAMAGING	TOLERATED	AC	V	GTg	DAMAGING	COMMON and COMMON	34.44	45.0234	45.635	44
17	72694725	72694726	rs767800099	rs777488868	CD300LF	A161V	A161S	NONSYNONYMOUS	NONSYNONYMOUS	3.231e-05	3.232e-05	TOLERATED	TOLERATED	AA	L	TTa	TOLERATED	RARE and RARE	26.92	NA	NA	1
17	73609112	73609113	rs820142	rs184391046	MYO15B	A116T	A116V	NONSYNONYMOUS	NONSYNONYMOUS	0.541	0.0188	TOLERATED	DAMAGING	AT	I	ATa	DAMAGING	COMMON and COMMON	41.89	46.18	46.43	6
17	78978275	78978276	rs61048303	rs61115021	AC127496.1	N73D	N73S	NONSYNONYMOUS	NONSYNONYMOUS	0.2836	0.3117	DAMAGING	DAMAGING	GG	G	GGt	DAMAGING	COMMON and COMMON	7.69	45.219	46.9	40
18	76752544	76752545	rs186555722	rs191414199	SALL3	A185S	A185V	NONSYNONYMOUS	NONSYNONYMOUS	0.0399	0.0398	TOLERATED	DAMAGING	TT	L	TTg	DAMAGING	COMMON and COMMON	41.38	51.209	51.19	10
19	1085965	1085966	rs149452932	rs3761028	HMHA1	T1151I	T1151	NONSYNONYMOUS	SYNONYMOUS	0.0074	0.5831	TOLERATED	NEUTRAL	TG	M	aTG	TOLERATED	RARE and COMMON	46.92	47.97	47.97	2
19	7677429	7677430	rs202045562	rs200075510	CAMSAP3	F711I	F711S	NONSYNONYMOUS	NONSYNONYMOUS	0.0016	0.0016	TOLERATED	TOLERATED	AC	T	ACc	TOLERATED	RARE and RARE	44.94	NA	NA	1
19	21606230	21606231	rs148183266	rs142910830	ZNF493	R257G	R257I	NONSYNONYMOUS	NONSYNONYMOUS	0.0092	0.0092	DAMAGING	TOLERATED	GT	V	GTa	TOLERATED	RARE and RARE	35.9	44.1383	41.96	6
19	42747229	42747230	rs11878620	rs117970118	AC006486.1	R76K	R76S	NONSYNONYMOUS	NONSYNONYMOUS	0.0888	0.0483	TOLERATED	DAMAGING	AC	N	aAC	DAMAGING	COMMON and COMMON	12.5	41.7637	43.04	24
19	44352665	44352666	rs2356437	rs1061769	ZNF283	C638R	C638Y	NONSYNONYMOUS	NONSYNONYMOUS	0.7494	0.4073	TOLERATED	TOLERATED	CA	H	CAt	TOLERATED	COMMON and COMMON	31.46	48.0469	45.5	88
19	44778797	44778799	rs2884015	rs2884016	ZNF233	L662M	L662	NONSYNONYMOUS	SYNONYMOUS	0.2645	0.1517	DAMAGING	NEUTRAL	ANA	I	AtA	DAMAGING	COMMON and COMMON	1.72	NA	NA	1
19	47285706	47285707	rs142211617	rs150805394	SLC1A5	E253V	E253K	NONSYNONYMOUS	NONSYNONYMOUS	0.0012	0.0018	TOLERATED	TOLERATED	AT	M	ATg	DAMAGING	RARE and RARE	43.1	49.7767	52.48	3
19	51297825	51297826	rs55716643	rs55735528	ACPT	A325T	A325D	NONSYNONYMOUS	NONSYNONYMOUS	0.2803	0.2803	TOLERATED	TOLERATED	AA	N	AAc	TOLERATED	COMMON and COMMON	1.11	41.8583	43.75	64
19	53792954	53792955	rs34683072	rs35700345	BIRC8	A225V	A225T	NONSYNONYMOUS	NONSYNONYMOUS	0.0347	0.0347	DAMAGING	TOLERATED	AT	M	ATg	DAMAGING	COMMON and COMMON	40.68	51.0035	50	17
20	30496422	30496423	-	-	TTLL9	D79Y	D79V	NONSYNONYMOUS	NONSYNONYMOUS	-	-	DAMAGING	DAMAGING	TT	F	TTc	DAMAGING	RARE and RARE	51.61	NA	NA	1
21	32638549	32638550	rs2070417	rs2070418	TIAM1	G247V	G247R	NONSYNONYMOUS	NONSYNONYMOUS	0.1112	0.1112	DAMAGING	DAMAGING	AT	M	ATg	DAMAGING	COMMON and COMMON	39.84	46.896	46.23	35
21	42866296	42866297	rs3787950	rs61735793	TMPRSS2	T112	T112I	SYNONYMOUS	NONSYNONYMOUS	0.1106	0.0094	NEUTRAL	TOLERATED	CA	M	aTG	DAMAGING	COMMON and RARE	30.49	37.8875	37.455	4
21	45152382	45152383	rs190069684	rs181726789	PDXK	A42T	A42E	NONSYNONYMOUS	NONSYNONYMOUS	0.0326	0.0326	TOLERATED	TOLERATED	AA	K	AAa	NEUTRAL	COMMON and COMMON	39.44	45.3943	46.93	7
21	46086718	46086719	rs7275281	rs7276859	KRTAP12-2	S29C	S29P	NONSYNONYMOUS	NONSYNONYMOUS	0.5656	0.5657	TOLERATED	TOLERATED	CG	R	CGc	TOLERATED	COMMON and COMMON	33.78	45.649	46.15	87
22	39497452	39497454	rs139298	rs139299	APOBEC3H	K121E	K121N	NONSYNONYMOUS	NONSYNONYMOUS	0.5736	0.5722	TOLERATED	DAMAGING	GNC	D	GaC	TOLERATED	COMMON and COMMON	17.39	45.8005	44.9495	90
X	35821055	35821056	rs4829390	rs4829391	MAGEB16	M248V	M248K	NONSYNONYMOUS	NONSYNONYMOUS	0.5627	0.5626	DAMAGING	TOLERATED	GA	E	GAg	TOLERATED	COMMON and COMMON	5.8	51.263	48	53
X	107978342	107978343	rs80131334	rs41307415	IRS4	R411	R411Q	SYNONYMOUS	NONSYNONYMOUS	0.0518	0.0516	NEUTRAL	DAMAGING	AT	H	cAT	DAMAGING	COMMON and COMMON	40.38	48.3421	48.065	14
